# Supplementary material for: MicroRNAs—A Promising Tool for Asthma Diagnosis and Severity Assessment: A Systematic Review
Source: MDPI journal article supplement (doi:10.3390/jpm12040543), 2022-03-29
Supplement: s1 [file s1]

**Table S1.** Search criteria and the results for MEDLINE, Embase and SCOPUS databases.

## A- MEDLINE (Ovid): 1992-now (14/09/2020)

| Step | Term             | No. of articles | Comments                           |
|------|------------------|-----------------|------------------------------------|
| 1    | Asthma/          | 125743          | Map Term to Subject Heading ticked |
| 2    | Asthma*          | 180907          |                                    |
| 3    | 1 or 2           | 180904          |                                    |
|      | microRNA*/       |                 |                                    |
| 4    | miRNA*           | 68259           |                                    |
| 5    | Micro RNA*       | 3267            |                                    |
| 6    | microRNA*        | 107926          |                                    |
| 7    | Small RNA*       | 13424           |                                    |
| 8    | 4 or 5 or 6 or 7 | 124021          |                                    |
| 9    | 3 and 8          | 560             |                                    |

## B- Embase (Ovid): 1992-now (14/09/2020)

| Step | Term             | No. of articles | Comments                           |
|------|------------------|-----------------|------------------------------------|
| 1    | Asthma*          | 273980          | Map Term to Subject Heading ticked |
| 2    | Asthma*          | 313480          |                                    |
| 3    | 1 or 2           | 313480          |                                    |
| 4    | miRNA*           | 93797           |                                    |
| 5    | Micro RNA*       | 6334            |                                    |
| 6    | microRNA*        | 168658          |                                    |
| 7    | Small RNA*       | 16272           |                                    |
| 8    | 4 or 5 or 6 or 7 | 179891          |                                    |
| 9    | 3 and 8          | 1238            |                                    |

## C- SCOPUS: 1992-now (14/09/2020)

| Step | Term             | No. of articles | Comments                    |
|------|------------------|-----------------|-----------------------------|
| 1    | Asthma*          | 204290          | Document search Ti, Ab, Key |
| 2    | miRNA*           | 73539           | Document search Ti, Ab, Key |
| 3    | microRNA*        | 135964          | Document search Ti, Ab, Key |
| 4    | "micro RNA*"     | 4262            | Document search Ti, Ab, Key |
| 5    | "small RNA*"     | 14574           | Document search Ti, Ab, Key |
| 6    | 2 or 3 or 4 or 5 | 149187          | Document search Ti, Ab, Key |
| 7    | 1 and 6          | 860             | Document search Ti, Ab, Key |
